# Supplementary material
Source: publisher site journal article supplement (https://www.dovepress.com/article/365217)
Supplement: Supplementary file 1 [file get_supplementary_file.php]

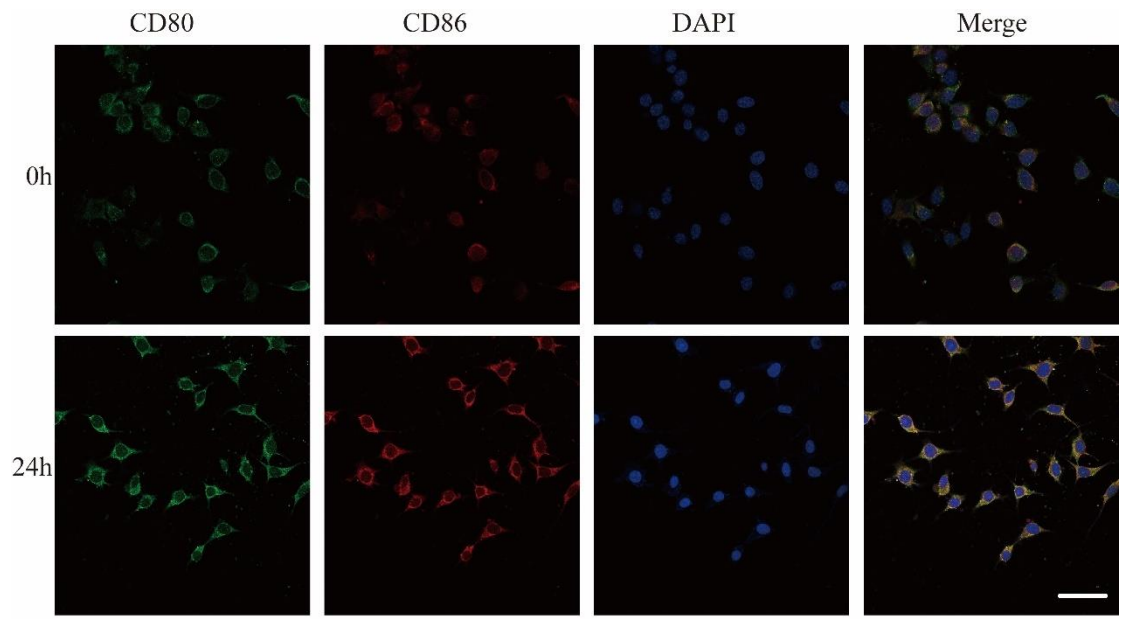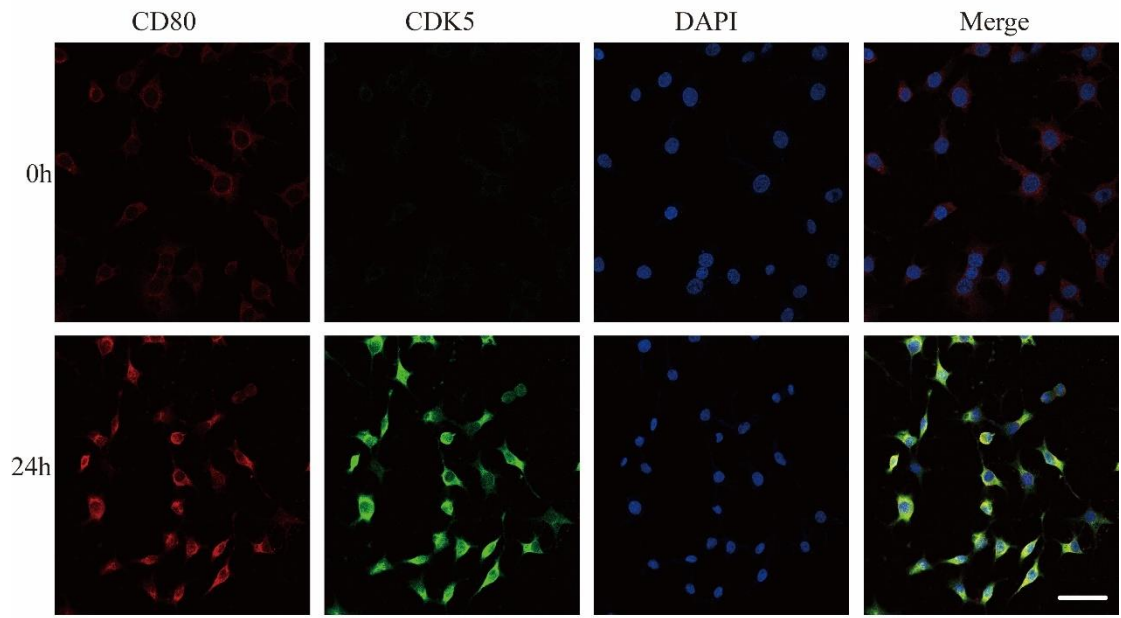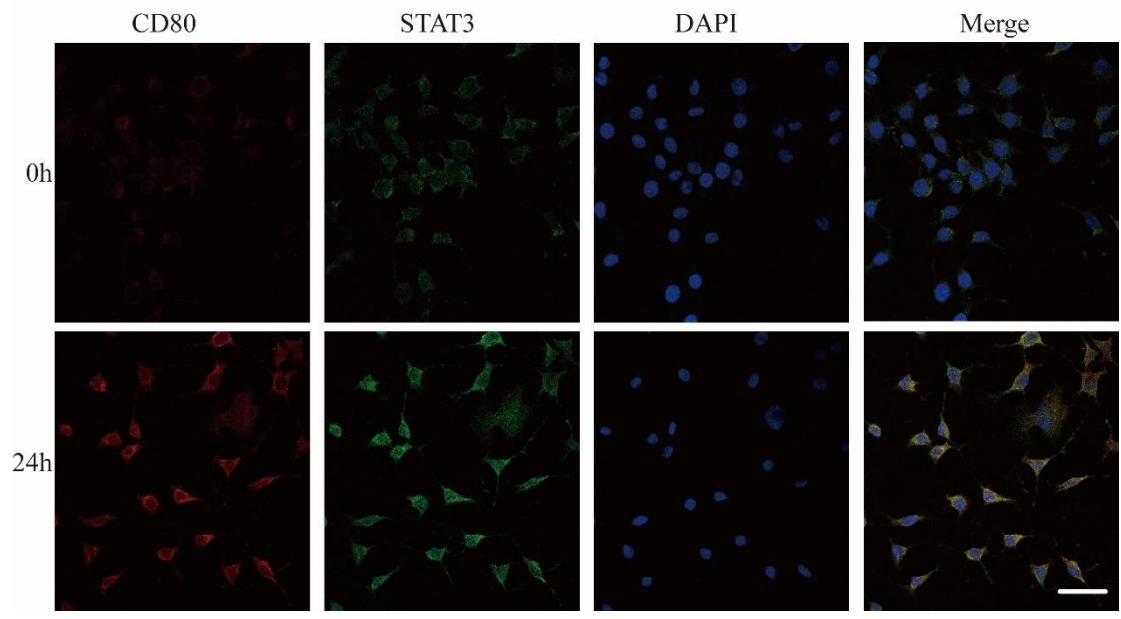

Figure S1. Expression of CD80, CD86, CDK5 and STAT3 in DC cells with LPS stimulation for 24h. Representative images from at least 3 experiments are shown. Scale bars, 50  $\mu$ m.

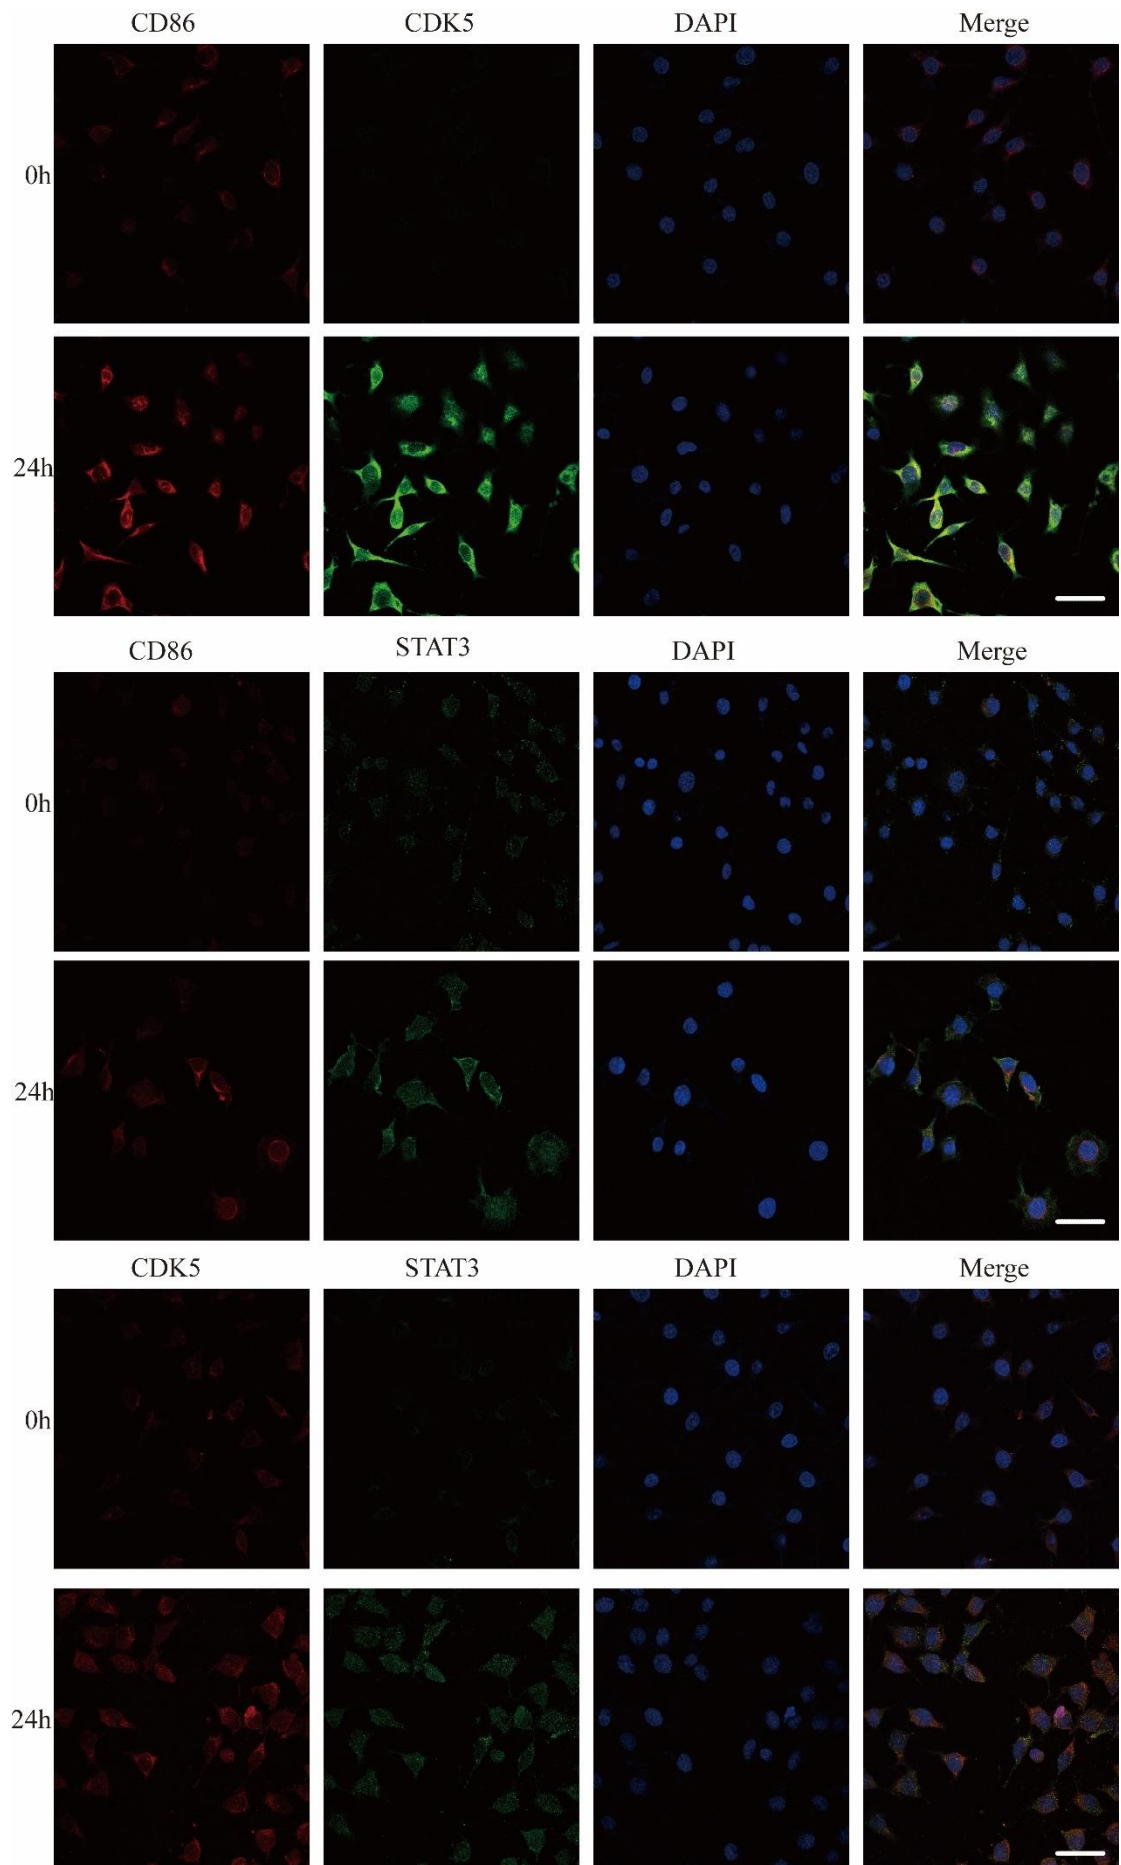

Figure S2. Expression of CD86, CDK5 and STAT3 in DC cells with LPS stimulation for 24h. Representative images from at least 3 experiments are shown. Scale bars, 50  $\mu$ m.

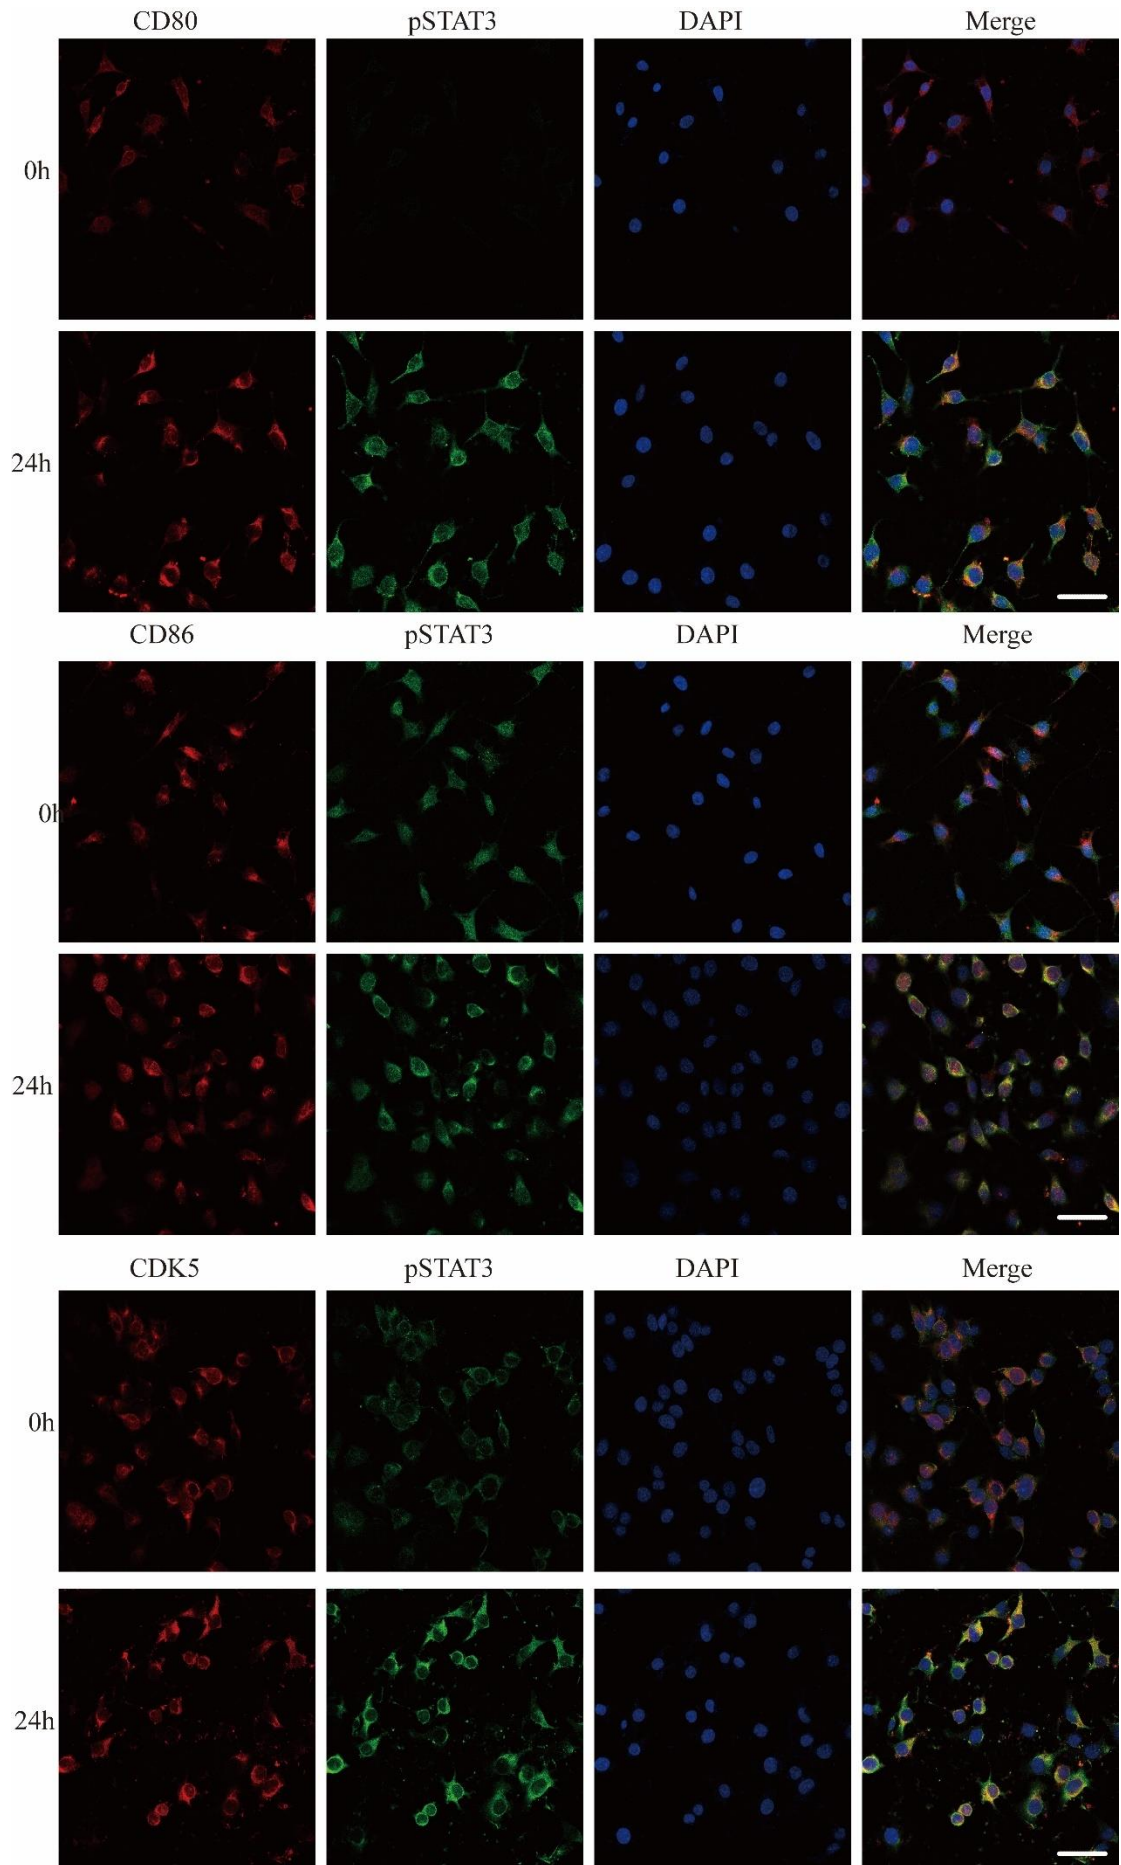

Figure S3. Expression of CD80, CD86, CDK5 and pSTAT3 in DC cells with LPS stimulation for 24h. Representative images from at least 3 experiments are shown. Scale bars, 50  $\mu$ m.
